# Supplementary material for: SDA: a semi-parametric differential abundance analysis method for metabolomics and proteomics data
Source: PubMed Central journal article supplement (PMC6798423; doi:10.1186/s12859-019-3067-z), 2019-10-17
Supplement: 12859_2019_3067_MOESM3_ESM.pdf [file 12859_2019_3067_MOESM3_ESM.pdf]

We consider the case of two-group comparison in presence of detection limit. Let  $Y_{ig}^*$  be the underlying abundance and  $D_{ig}$  be the detection limit for feature  $g$  in subject  $i$ , respectively. We assume  $(Y_{ig}^*, D_{ig}), i = 1, \dots, n$  are independent and identically distributed (i.i.d.). The observed abundance level is  $Y_{ig} = Y_{ig}^* I\{Y_{ig}^* > D_{ig}\}$ . Let  $X_i = 0$  or  $1$  indicates the group assignment of subject  $i$ . For the two-group comparison situation, the two-part semiparametric model proposed in the main text is

$$\log(Y_{ig}) = \beta_g X_i + \epsilon_{ig} \text{ for } Y_{ig} > 0 \text{ and } \log\left(\frac{\pi_{ig}}{1 - \pi_{ig}}\right) = \gamma_{0g} + \gamma_g X_i \text{ for } Y_{ig} = 0,$$

where  $\epsilon_{ig}, i = 1, \dots, N$  are i.i.d. random errors with an unspecified distribution and are independent with  $X_i$ .

Under the null hypothesis  $H_0 : \beta_g = 0$  and  $\gamma_g = 0$ , we have

$$\log(Y_{ig}) = \epsilon_{ig} \text{ for } Y_{ig} > 0 \text{ and } \log\left(\frac{\pi_{ig}}{1 - \pi_{ig}}\right) = \gamma_{0g} \text{ for } Y_{ig} = 0. \quad (\text{S1})$$

The above model is for observed abundance  $Y_{ig}$  and the likelihood ratio test  $LRT_g$  we construct in the main text is to compare the distribution of  $Y_{ig}$  between groups. Note that since the distribution of  $\epsilon_{ig}$  is completely unspecified, model (S1) holds as long as  $Y_{ig}$ 's are i.i.d. and independent of  $X_i$ . Because of this nice property,  $LRT_g$  can also be used to compare the distribution of  $Y_{ig}^*$  between groups, as stated in the following proposition.

**Proposition S1.** For two-group comparison, assuming that the detection limit  $D_{ig}$  is independent of group  $X_i$ , the likelihood ratio test  $LRT_g$  proposed in the main text is also a valid test for

$$\begin{aligned} H_0^* &: \text{the distribution of } Y_{ig}^* \text{ is the same between groups} \\ \text{v.s. } H_1^* &: \text{the distribution of } Y_{ig}^* \text{ is different between groups} \end{aligned}$$

in the sense that the type I error rate is preserved.

**Proof:** The critical region of the likelihood ratio test is  $\{LRT_g > \chi_{2,1-\alpha}^2\}$ , where  $P(LRT_g > \chi_{2,1-\alpha}^2 | H_0) = \alpha$ , where  $\chi_{2,1-\alpha}^2$  is the  $1 - \alpha$  quantile of a chi-square distribution with 2 degrees of freedom and  $\alpha$  is the type I error rate. We next show that hypothesis  $H_0^*$  implies  $H_0$  so that  $LRT_g$  is also a valid test for  $H_0^*$ . Specifically,  $H_0^*$  implies that  $Y_{ig}^*$  is independent with  $X_i$ . Because  $Y_{ig} = Y_{ig}^* I\{Y_{ig}^* > D_{ig}\}$  and  $D_{ig}$  is independent with  $X_i$ ,  $Y_{ig}$  is also independent with  $X_i$ . Thus, the distribution of  $Y_{ig}$  satisfies equation (S1) and  $H_0$  holds. This implies that  $P(LRT_g > \chi_{2,1-\alpha}^2 | H_0^*) = P(LRT_g > \chi_{2,1-\alpha}^2 | H_0) = \alpha$ . Therefore,  $LRT_g$  is a valid test for  $H_0^*$ .

*Remark 1.* Our test  $LRT_g$  preserves the type I error rate regardless of the distribution of the underlying abundance level  $Y_{ig}^*$ .

*Remark 2.* If our test is rejected, it indicates there is difference in the distribution of  $Y_{ig}^*$  between groups. But the parameter estimate,  $\hat{\beta}_g$ , obtained from our model quantifies the log fold change of observed abundance level between groups rather than that of underlying abundance level.
